# Supplementary material for: The STRIPAK complex components FAM40A and FAM40B regulate endothelial cell contractility via ROCKs
Source: PubMed Central journal article supplement (PMC6276190; doi:10.1186/s12860-018-0175-y), 2018-12-03

Additional file 1

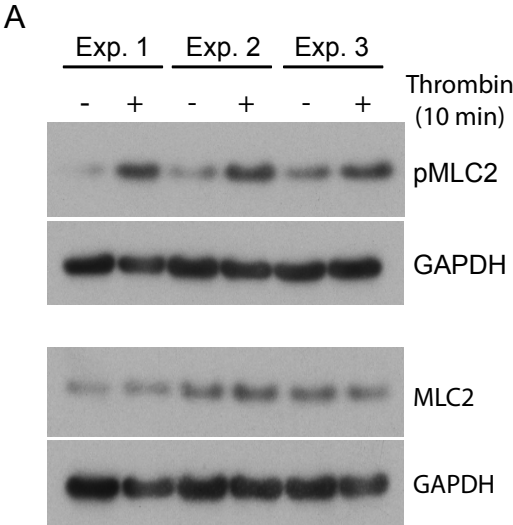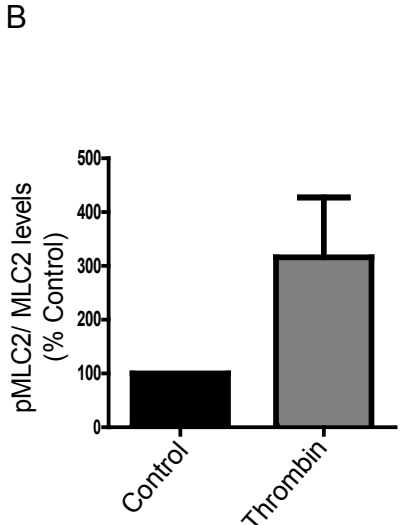

Supplement: 12860_2018_175_MOESM1_ESM.pdf [file 12860_2018_175_MOESM1_ESM.pdf]
